# Supplementary material
Source: PubMed Central journal article supplement (PMC7722082)
Supplement: NIHMS1639088-supplement-Appendix.pdf [file NIHMS1639088-supplement-Appendix.pdf]

## APPENDICES

Appendix 1. Comparison<sup>†</sup> of included and excluded participants<sup>‡</sup> on selected characteristics

| Characteristic                            | No information/<br>Excluded (N=62) | Information/<br>Included (N=3573) |
|-------------------------------------------|------------------------------------|-----------------------------------|
| Respondent type*                          |                                    |                                   |
| Proxy                                     | 18 (29%)                           | 465 (13%)                         |
| Patient                                   | 44 (71%)                           | 3108 (87%)                        |
| Patient age                               |                                    |                                   |
| ≤59 years                                 | 21 (34%)                           | 1420 (40%)                        |
| 60-69 years                               | 14 (23%)                           | 1112 (31%)                        |
| 70-79 years                               | 21 (34%)                           | 825 (23%)                         |
| 80+ years                                 | 6 (10%)                            | 216 (6%)                          |
| Patient education*                        |                                    |                                   |
| <High school                              | 18 (29%)                           | 676 (19%)                         |
| Some university                           | 36 (58%)                           | 2049 (57%)                        |
| University degree+                        | 7 (11%)                            | 833 (23%)                         |
| Missing                                   | 1 (2%)                             | 15 (<1%)                          |
| Patient general health <sup>§</sup>       |                                    |                                   |
| Poor                                      | 7 (11%)                            | 274 (8%)                          |
| Fair                                      | 12 (19%)                           | 772 (22%)                         |
| Good                                      | 22 (36%)                           | 1236 (35%)                        |
| Very good                                 | 10 (16%)                           | 916 (26%)                         |
| Excellent                                 | 7 (11%)                            | 358 (10%)                         |
| Missing                                   | 4 (7%)                             | 17 (<1%)                          |
| Patient feels calm/peaceful <sup>§*</sup> |                                    |                                   |
| None of the time                          | 8 (13%)                            | 104 (3%)                          |
| A little of the time                      | 10 (16%)                           | 456 (13%)                         |
| Some of the time                          | 12 (19%)                           | 927 (26%)                         |
| Most of the time                          | 19 (31%)                           | 1428 (40%)                        |
| All of the time                           | 7 (11%)                            | 648 (18%)                         |
| Missing                                   | 6 (10%)                            | 10 (<1%)                          |
| Patient insurance status*                 |                                    |                                   |
| Insured (non-Medicaid)                    | 35 (57%)                           | 2967 (83%)                        |
| Uninsured                                 | 7 (11%)                            | 263 (7%)                          |
| Medicaid/low income insurance             | 14 (23%)                           | 335 (9%)                          |
| Missing                                   | 6 (10%)                            | 8 (<1%)                           |
| Language of survey                        |                                    |                                   |
| English                                   | 59 (95%)                           | 3396 (95%)                        |
| Spanish                                   | 3 (5%)                             | 112 (3%)                          |
| Chinese                                   | 0 (0%)                             | 65 (2%)                           |
| Cancer type                               |                                    |                                   |
| Lung                                      | 29 (47%)                           | 1726 (48%)                        |
| Colorectal                                | 33 (53%)                           | 1847 (52%)                        |
| Cancer stage                              |                                    |                                   |
| Not advanced                              | 38 (61%)                           | 2287 (64%)                        |
| Advanced                                  | 19 (31%)                           | 1109 (31%)                        |
| Unstaged                                  | 5 (8%)                             | 177 (5%)                          |
| CanCORS study site                        |                                    |                                   |
| 5 integrated delivery systems             | 10 (16%)                           | 462 (13%)                         |
| 8 counties in Northern CA                 | 11 (18%)                           | 745 (21%)                         |
| State of Alabama                          | 7 (11%)                            | 487 (14%)                         |
| Los Angeles County                        | 18 (29%)                           | 747 (21%)                         |
| State of Iowa                             | 8 (13%)                            | 346 (10%)                         |
| 23 counties in North Carolina             | 5 (8%)                             | 383 (11%)                         |
| 15 VA Medical Centers                     | 3 (5%)                             | 403 (11%)                         |

| <b>Characteristic</b>           | <b>No information/<br/>Excluded (N=62)</b> | <b>Information/<br/>Included (N=3573)</b> |
|---------------------------------|--------------------------------------------|-------------------------------------------|
| Patient race/ethnicity*         |                                            |                                           |
| White                           | 32 (52%)                                   | 2358 (66%)                                |
| Latino                          | 12 (19%)                                   | 296 (8%)                                  |
| Black                           | 12 (19%)                                   | 506 (14%)                                 |
| Asian                           | 2 (3%)                                     | 226 (6%)                                  |
| Other                           | 4 (7%)                                     | 187 (5%)                                  |
| Patient chemotherapy treatment* |                                            |                                           |
| Completed                       | 54 (87%)                                   | 3470 (97%)                                |
| Ongoing/to start                | 8 (13%)                                    | 103 (3%)                                  |
| Patient gender                  |                                            |                                           |
| Male                            | 32 (52%)                                   | 2073 (58%)                                |
| Female                          | 30 (48%)                                   | 1500 (42%)                                |

†Chi-square or Fisher's exact test used for all comparisons. All comparisons undertaken in R Studio (v1.1.383);

‡All participants considered for inclusion had either received or were scheduled for chemotherapy. Participants were included if they provided information on preferred and actual decision roles, and excluded if they lacked such information; §Self-reported if patient, proxy-reported if proxy; \*Comparison was statistically significant at  $p < 0.05$
